# Supplementary material for: A Bibliometric Review of the Keap1/Nrf2 Pathway and its Related Antioxidant Compounds
Source: MDPI journal article supplement (doi:10.3390/antiox8090353), 2019-09-01
Supplement: s1 [file s1]

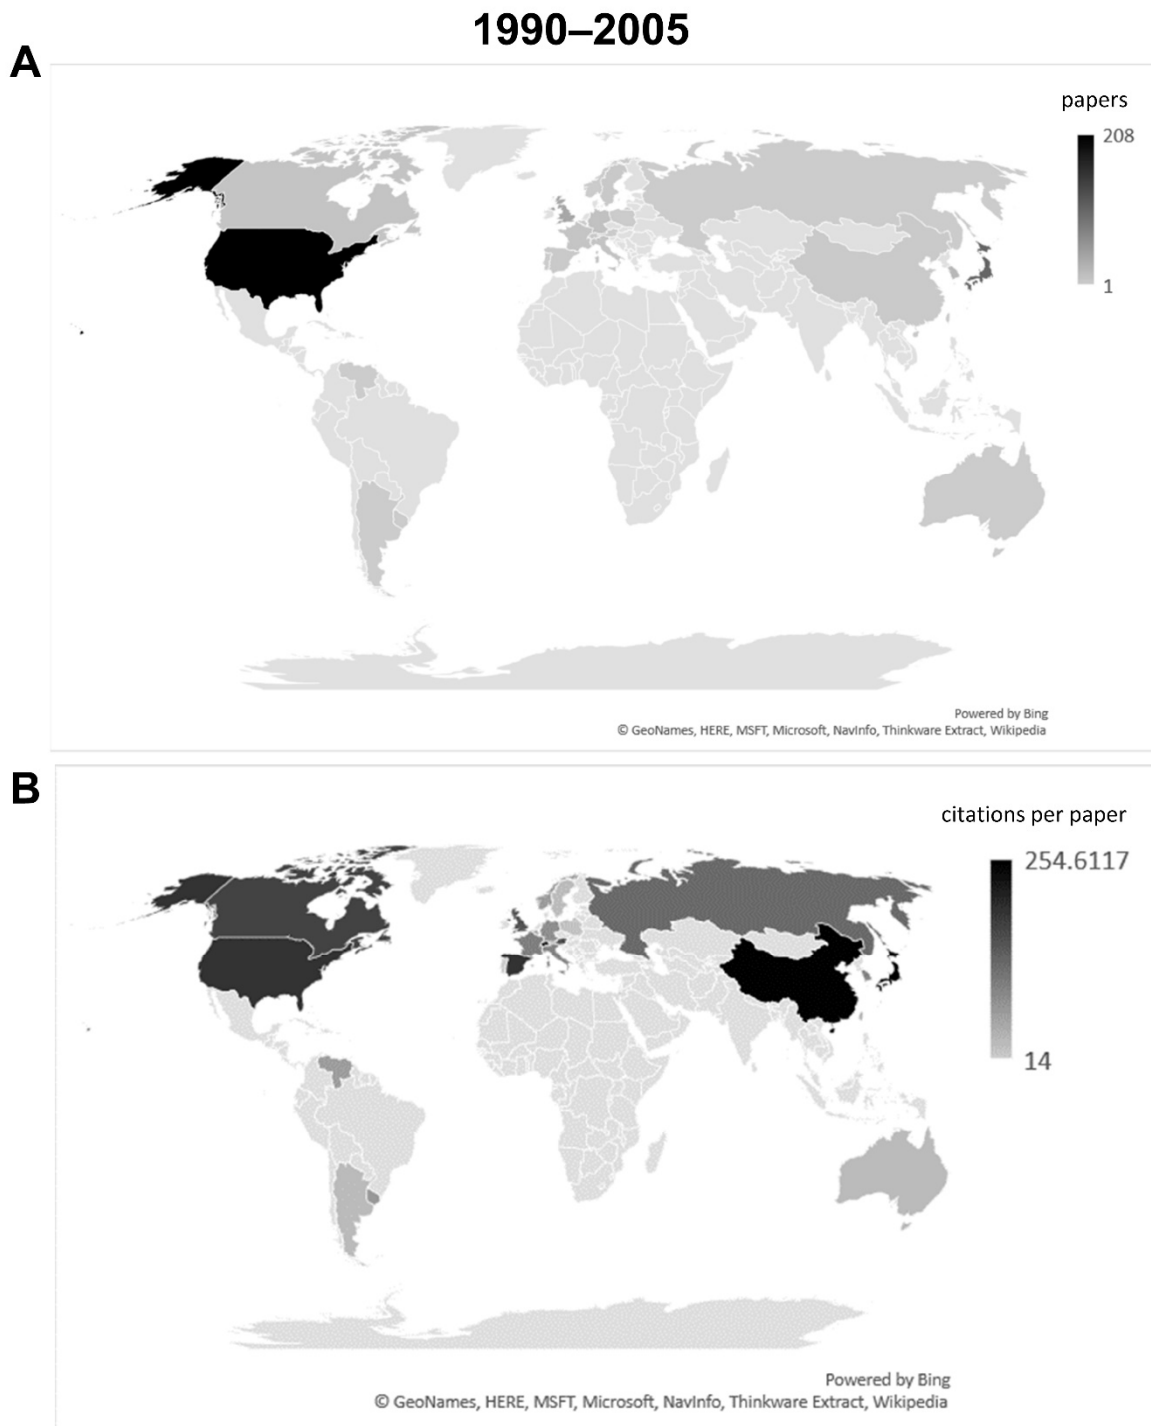

**Figure S1. World map depicting the number of Nrf2-related papers by each country in the period 1990–2005 and the respective citations received by these papers.** Each paper may be counted by more than one country (international collaboration). **A. Number of papers by country.** The darker the color of a country, the higher the number of Nrf2-related papers published. **B. Averaged citations per Nrf2-related paper per country.** The darker the color of a country, the higher the number of citations per Nrf2-related paper. Countries with at least 1 publication are depicted. Note that “England”, “Scotland”, “Wales” and “Northern Ireland” records from the “Web of Science” were combined into “UK”.
