# Supplementary material for: A Bibliometric Review of the Keap1/Nrf2 Pathway and its Related Antioxidant Compounds
Source: MDPI journal article supplement (doi:10.3390/antiox8090353), 2019-09-01
Supplement: s1 [file s1]

2011–2015

A

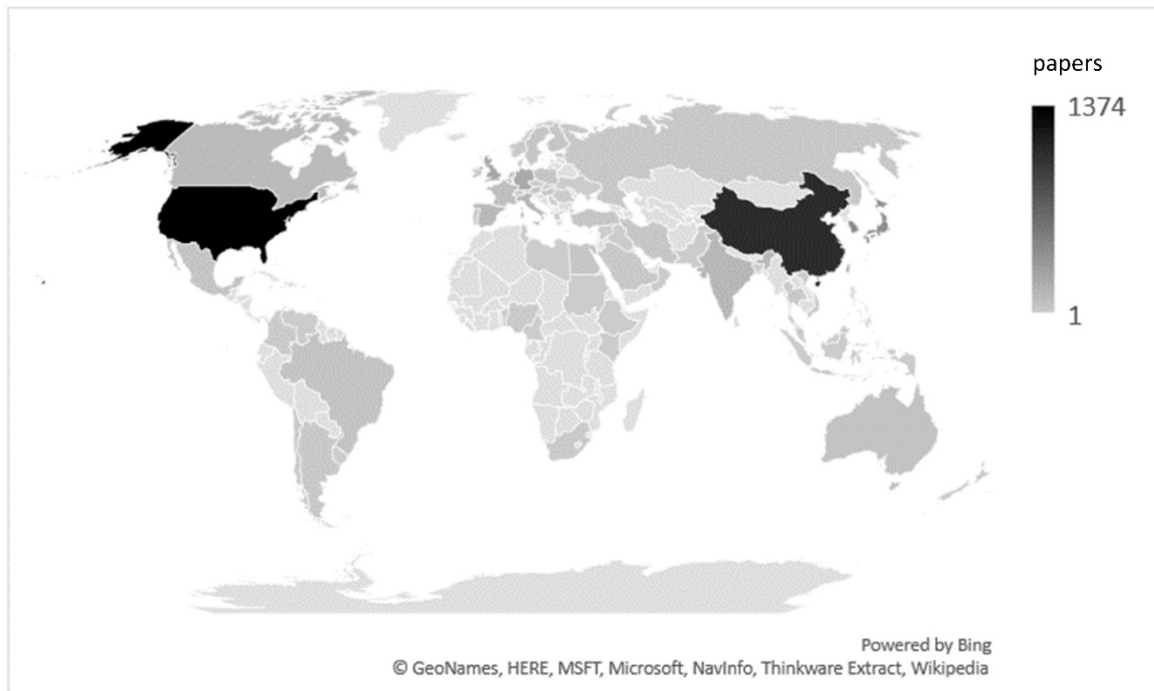

B

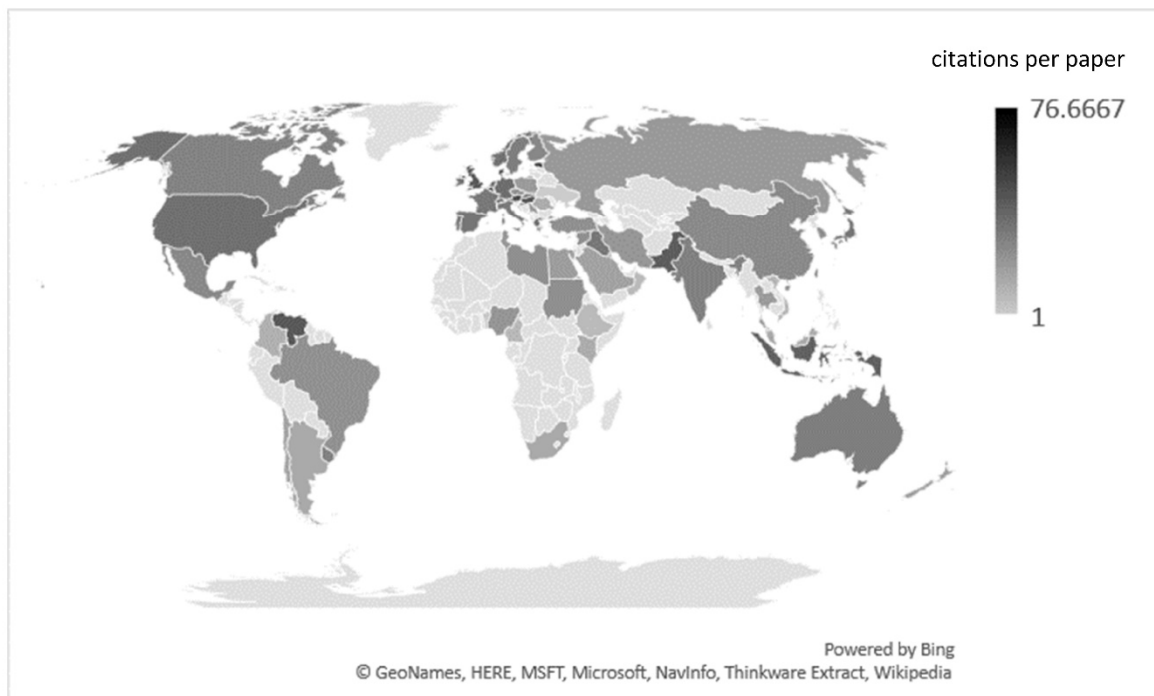

**Figure S3. World map depicting the number of Nrf2-related papers by each country in the period 2011–2015 and the respective citations received by these papers. Each paper may be counted by more than one country (international collaboration). A. Number of papers by country.** The darker the color of

a country, the higher the number of Nrf2-related papers published. **B. Averaged citations per Nrf2-related paper per country.** The darker the color of a country, the higher the number of citations per Nrf2-related paper. Countries with at least 1 publication are depicted. Note that “England”, “Scotland”, “Wales” and “Northern Ireland” records from the “Web of Science” were combined into “UK”.
